# Supplementary material for: Nuclear congression is driven by cytoplasmic microtubule plus end interactions in S. cerevisiae
Source: PubMed Central journal article supplement — J Cell Biol. 2006 Jan 2;172(1):27–39. doi: 10.1083/jcb.200510032 (PMC2063526; doi:10.1083/jcb.200510032), 2006-01-02
Supplement: jcellbiol_jcb.200510032_14.pdf [file jcellbiol_jcb.200510032_14.pdf]

**Table S1. Nuclear orientation and cytoplasmic MT attachment frequencies**

| <b>Cell type</b> | <b>Orient to shmoo tip</b> | <b><i>n</i></b> | <b>Degree of persistence</b> | <b>Attach/total time (min)</b> | <b><i>n</i></b> |
|------------------|----------------------------|-----------------|------------------------------|--------------------------------|-----------------|
| Wild type        | 98%                        | 103             | 100%                         | 200/200                        | 10              |
| <i>kip2Δ</i>     | 99%                        | 105             | 40%                          | 79.5/200                       | 10              |
| <i>kar9Δ</i>     | 55%                        | 100             | 18%                          | 31/180                         | 9               |
| <i>bik1Δ</i>     | 97%                        | 105             | 12%                          | 35.5/300                       | 15              |
| <i>kar3Δ</i>     | 95%                        | 102             | 54%                          | 107/200                        | 10              |

Measurements of nuclear orientation and cytoplasmic MT attachment to the shmoo tip. Nuclear orientation was measured by SPB position, and MT attachment was scored by the degree of persistence (see Materials and methods for details).

**Table S2. Frequency of nuclear congression defects in bilateral karyogamy mutants**

| <b>Bilateral cross</b>      | <b>Normal congression</b> | <b>Aberrant congression</b> | <b><i>n</i></b> |
|-----------------------------|---------------------------|-----------------------------|-----------------|
| Wild type × Wild type       | 38 (100%)                 | 0 (0%)                      | 38              |
| <i>dhc1Δ</i> × <i>dhc1Δ</i> | 67 (100%)                 | 0 (0%)                      | 67              |
| <i>kip3Δ</i> × <i>kip3Δ</i> | 21 (100%)                 | 0 (0%)                      | 21              |
| <i>kip2Δ</i> × <i>kip2Δ</i> | 36 (100%)                 | 0 (0%)                      | 36              |
| <i>kar9Δ</i> × <i>kar9Δ</i> | 23 (59%)                  | 16 (41%)                    | 39              |
| <i>bik1Δ</i> × <i>bik1Δ</i> | 10 (23%)                  | 33 (77%)                    | 43              |
| <i>kar3Δ</i> × <i>kar3Δ</i> | 1 (1%)                    | 85 (99%)                    | 86              |

Nuclear congression efficiency among karyogamy mutants. Nuclear congression was scored as successful when both SPBs were fused into a single GFP-Tub1p focus or two closely opposed foci. Aberrant congression was recorded when the SPBs were found distal to each other (>1 μm).
